# Supplementary material for: A novel thin film polarizer from photocurable non-aqueous lyotropic chromonic liquid crystal solutions
Source: Royal Society of Chemistry journal article supplement (doi:10.1039/c0jm03882b), 2011-01-01
Supplement: c0jm03882b.pdf [file c0jm03882b.pdf]

## [Electronic Supplementary Informations]

# Novel Thin Film Polarizer Based on Non-Aqueous Lyotropic Chromonic Liquid Crystal Solutions

Yun-Ju Bae,<sup>1</sup> Hye-Jin Yang,<sup>1</sup> Seung-Han Shin,<sup>2</sup> Kwang-Un Jeong,<sup>1a)</sup>, and  
Myong-Hoon Lee<sup>1a)</sup>

<sup>1</sup>*Department of Polymer/Nano Science and Technology, Chonbuk National  
University, Jeonju, Chonbuk 561-756 Korea*

<sup>2</sup>*Korea Institute of Industrial Technology, Chonan, Chungnam 330-825 Korea*

## EXPERIMENTALS

**Synthesis of bis-(N,N-diethylaminoethyl)perylene-3,4,9,10-tetracarboxylic diimide (PDI) :** The synthetic procedure for PDI is displayed in **Scheme S1**. 5 g (12.7 mmol) of 3,4,9,10-perylenetetracarboxylic dianhydride (Aldrich) and 30 ml of *N,N*-diethylethylenediamine were mixed and refluxed for 26 h. After cooling, the reaction mixture was first filtered and washed with methanol and ethyl acetate, and then dried in a vacuum oven for 24 h at room temperature. Bis-(N,N-diethylaminoethyl)perylene-3,4,9,10-tetra-carboxylic diimide (PDI) was obtained in 98% yield.<sup>1</sup>

FT-IR (KBr pellet): 2970, 2811, 1693, 1653, 1590, 1296, 1515, 1444, 1353, 1291, 1245, 1166, 1098, 746, 803, and 851 cm<sup>-1</sup>; <sup>1</sup>H-NMR (CF<sub>3</sub>COOD,  $\delta$  in ppm): 8.97(4H), 8.97(4H), 4.88(4H), 3.81(4H), 3.61(8H), and 1.57(12H).

**Synthesis of PDI-HCl salt :** In a 100 ml round bottom flask, 0.2 g of PDI was completely dissolved with excess amount (ca. 50 ml) of aqueous 0.1N HCl. The solvent was removed by using rotary evaporator followed by drying in a convection oven at 100 °C for 12 h.

---

<sup>1</sup>) I. K. Iverson and S.-W. Tam-Chang, *J. Am. Chem. Soc.*, **121**, 5801 (1999)

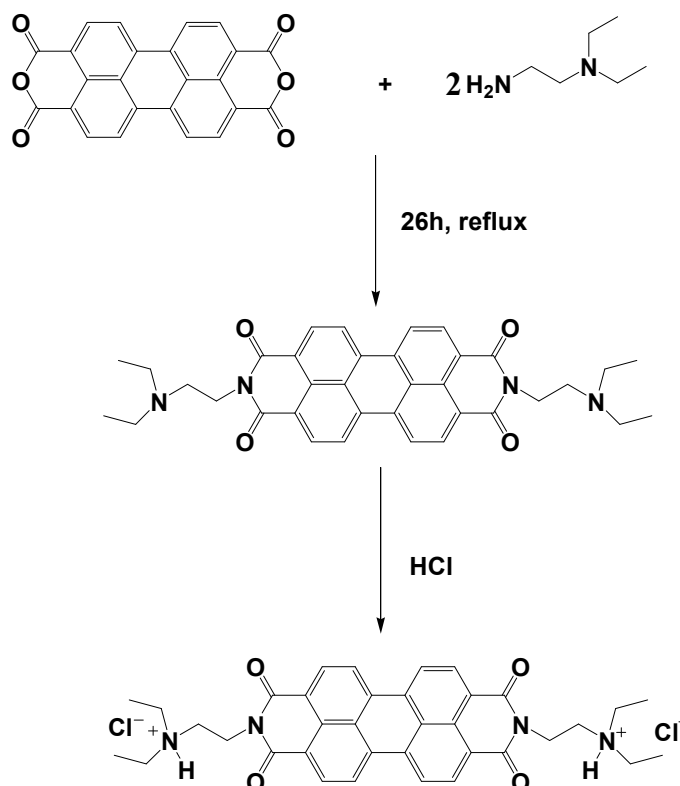

**Scheme 1.** Synthetic Procedure for PDI and PDI-HCl

**Preparation of PDI-AA/AA solution:** Acrylic acid (Junsei Chem.) was purchased and vacuum distilled in the presence of spiral copper wire prior to use. Photoinitiator, 2,4,6-trimethylbenzoyl- diphenyl phosphine (TPO) was used as purchased from Ciba-Geigy. Crosslinking agent (pentaerythritoltetraacrylate, PETA) was purchased from Aldrich and used as received. To prepare a 25 wt% PDI solution, 0.10 g of PDI was completely dissolved in 0.3 g of acrylic acid contained in an amber-colored vial wrapped with aluminum foil. Then, 0.03 g of TPO (10 wt% to AA amount) and 0.6 g of PETA (20 wt% to AA) were added to this solution and homogeneously mixed by using ultrasonic treatment below 30 °C. Solutions having different concentrations of PDI, TPO and PETA had been also prepared in a similar method for the optimization of conditions. For example, solution containing PETA higher than 30 wt% showed a phase separation.

**Film preparation:** 25 wt% PDI-AA/AA solution was manually coated on a substrate by using a glass rod, followed by a subsequent UV irradiation by using a conventional high pressure Hg arc light source ( $15 \text{ mW/cm}^2$ ) for 3-10 min. For comparison, PDI-HCl/water solution (20 wt% PDI) was shear-coated in the same method, and dried at  $60^\circ\text{C}$  for 1 h.

**Measurement of degree of polarization ( $P_{40\%}$ ):** Home-made polarized UV-vis spectroscopy was constructed as shown in Figure S1a. On a UV-vis spectrometer (Scinco S-3100), rotational polarizer and sample stage were installed between a light source and a photo-detector. By rotating polarizing axis, angular-dependent transmission spectra of the film were obtained as shown in Figure S1b.

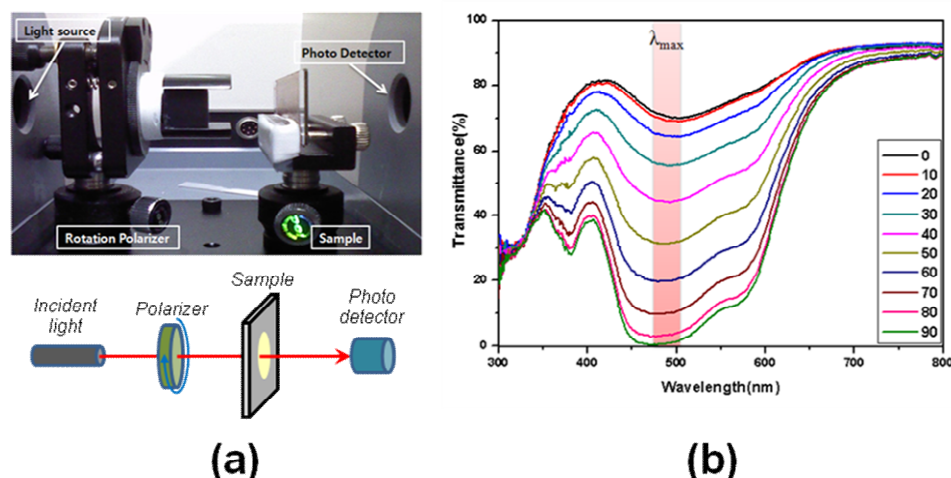

**Figure S1.** (a) Schematic diagram and photograph of polarized UV-vis spectrometer, and (b) angular-dependent transmission spectra.

$T_{//}$  and  $T_{\perp}$  are defined as a measured transmittance when the shearing direction is parallel and orthogonal to the incident polarized light, respectively. The mean transmittance (or transmittance of single polarizer),  $T_{\text{single}}$ , is defined by following equation:

$$T_{\text{single}} = (T_{//} + T_{\perp})/2 \quad (1)$$

Degree of polarization (P) is also defined by following equation:

$$P = (T_{//} - T_{\perp})/(T_{//} + T_{\perp}) \quad (2)$$

Since, in general, maximum degrees of polarization are compared at the same transmittance level, the spectral data of  $T_{//}$ ,  $T_{\perp}$  and  $T_{\text{single}}$  are normalized so that minimum mean transmittance ( $T_{\text{single}}$ ) becomes 40 % at the maximum absorption. Therefore,  $P_{40\%}$  is defined as the modified degree of polarization when minimum  $T_{\text{single}}$  is 40 % at the maximum absorption.

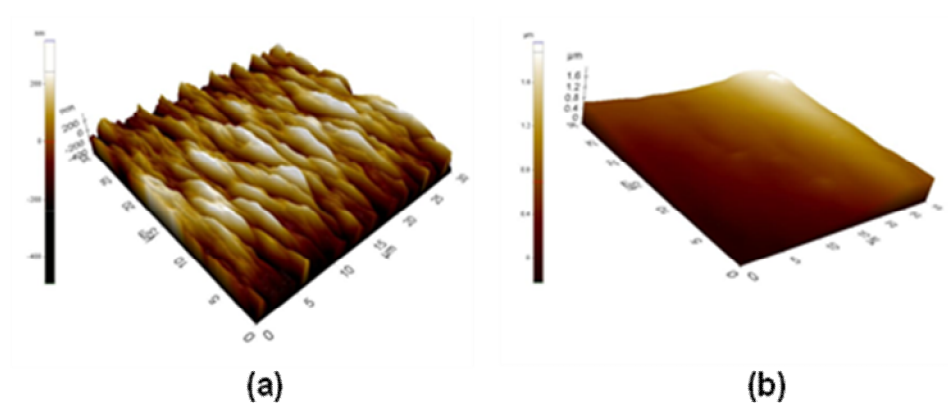

**Figure S2.** AFM images of shear-coated films on glass substrate: (a) 20 wt% PDI-HCl/water, dry 1h, 60 °C, and (b) 25 wt% PDI-AA/AA, UV cure, 5 min.

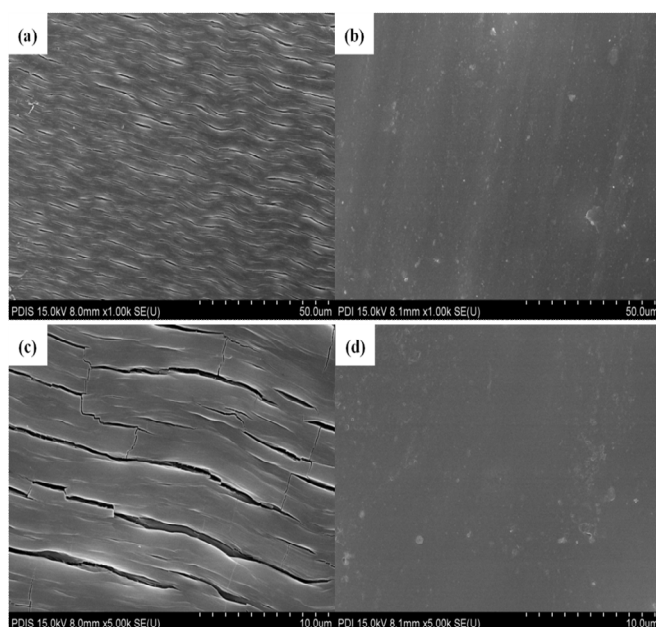

**Figure S3.** SEM images of (a, c) PDI-HCl/water film, (b, d) PDI-AA/AA film

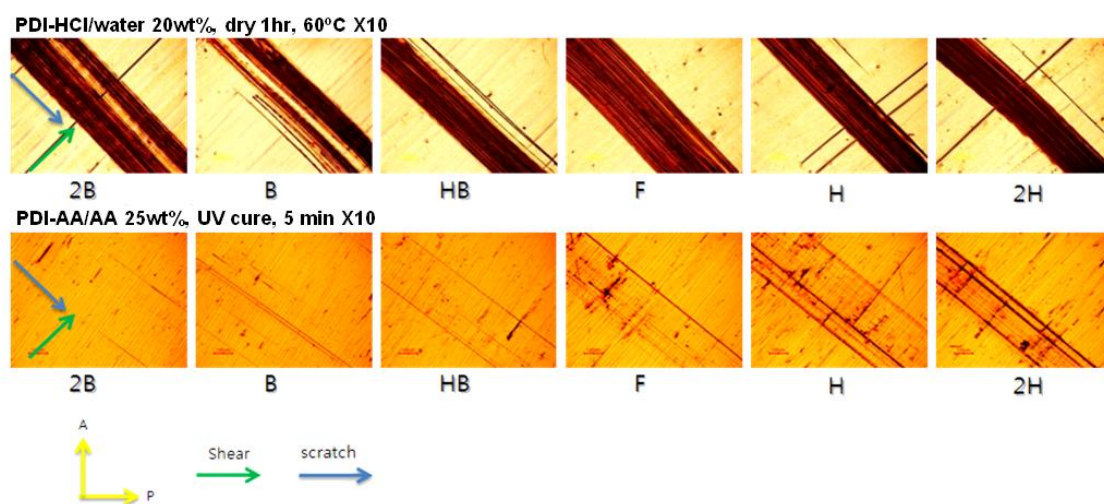

**Figure S4.** POM images of pencil hardness tests.

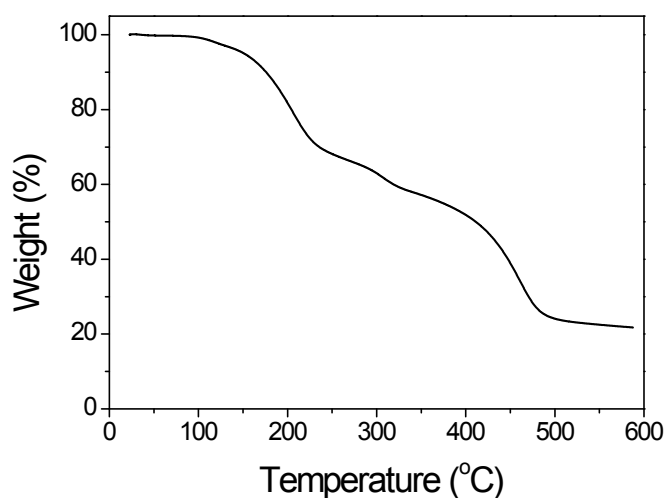

**Figure S5.** TGA thermogram of PDI-AA/AA 25 wt% after UV curing.

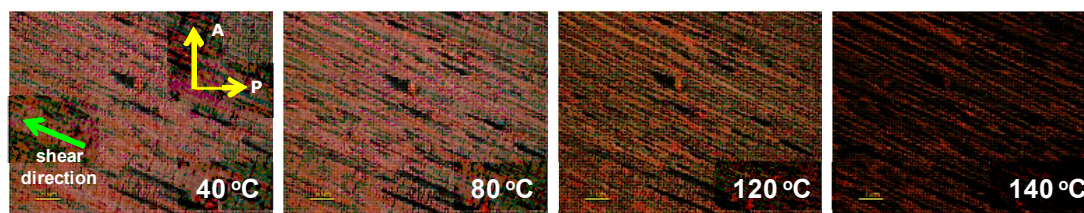

**Figure S6.** POM images of PDI-AA/AA film at various temperatures.

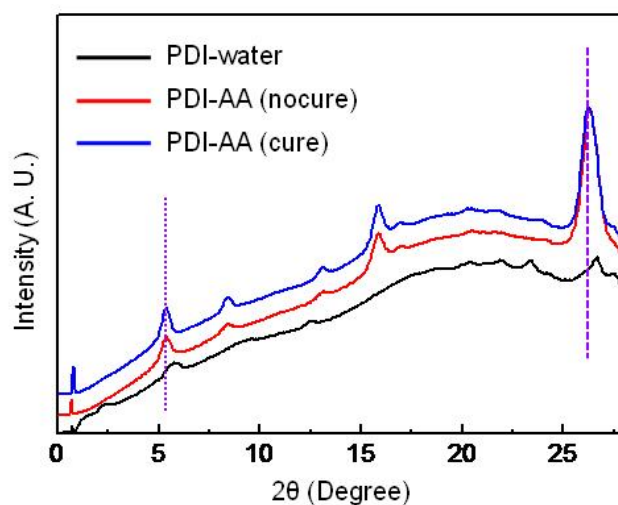

**Figure S7.** WAXD patterns of films prepared from (a) PDI-HCl/water (black), (b) PDI-AA/AA before UV curing (red), and (c) PDI-AA/AA after UV curing (blue) for 5 min.

**Table S1.**  $2\theta$  and  $d$ -spacings detected by WAXD.

| Samples                      | $2\theta$ ( $d$ -spacing) | $2\theta$ ( $d$ -spacing) |
|------------------------------|---------------------------|---------------------------|
| PDI-HCl/water (after drying) | $5.78^\circ$ (15.29 Å)    | $26.64^\circ$ (3.35 Å)    |
| PDI-AA/AA (before UV curing) | $5.38^\circ$ (16.43 Å)    | $26.28^\circ$ (3.39 Å)    |
| PDI-AA/AA (after UV curing)  | $5.38^\circ$ (16.43 Å)    | $26.28^\circ$ (3.39 Å)    |
